# Supplementary material for: No association of COMT with insight problem solving in Chinese college students
Source: PeerJ. 2019 Apr 15;7:e6755. doi: 10.7717/peerj.6755 (PMC6472467; doi:10.7717/peerj.6755)
Supplement: Data S1 — The raw data for insight problem solving accuracy rate, gender, age and COMT genotypes (rs737865, rs5993883, rs4633, rs6267, rs4818, rs4680). [file peerj-07-6755-s001.xls]

## Sheet: raw data
ID	total_insight	verbal_insight	figural_insight	gender	age	rs737865	rs5993883	rs4633	rs6267	rs4818	rs4680
SNPS148797	0.4	0.4	0.4	1	18	TT	GT	TC	GG	GC	AG
SNPS148798	0	0	0	2	20	TT	TT	CC	GG	GC	GG
SNPS148799	0	0	0	1	19	CC	GG	TC	GG	GC	AG
SNPS148800	0.1	0.2	0	1	18	TT	GT	CC	TG	CC	GG
SNPS148801	0.4	0.4	0.4	1	21	TT	TT	CC	GG	GC	GG
SNPS148802	0.1	0.2	0	1	20	CT	GT	CC	GG	GC	GG
SNPS148803	0.7	0.8	0.6	1	21	CT	GT	CC	TG	CC	GG
SNPS148804	0	0	0	2	19	TT	GG	CC	TG	CC	GG
SNPS148805	0.125	0.25	0	2	19	CT	GT	TC	GG	GC	AG
SNPS148806	0.3	0.2	0.4	2	18	TT	GT	TC	GG	CC	AG
SNPS148807	0.3	0	0.6	1	18	TT	TT	TC	GG	CC	AG
SNPS148808	0.3	0.2	0.4	1	19	TT	GT	TC	GG	CC	AG
SNPS148809	0.4	0.2	0.6	1	19	CT	GT	CC	GG	GC	GG
SNPS148811	0.111111	0.2	0	1	21	TT	GT	TT	GG	CC	AA
SNPS148812	0.2	0.2	0.2	1	19	TT	GT	TC	GG	CC	AG
SNPS148813	0.3	0.4	0.2	2	19	CT	GT	CC	TG	GC	GG
SNPS148815	0.1	0	0.2	1	19	TT	TT	CC	GG	GC	GG
SNPS148816	0.4	0.2	0.6	1	19	TT	TT	CC	GG	CC	GG
SNPS148818	0.3	0.4	0.2	1	19	CT	GT	TC	GG	GC	AG
SNPS148819	0.6	0.4	0.8	1	20	CT	GT	CC	GG	GG	GG
SNPS148820	0.2	0.2	0.2	1	20	CT	GG	CC	GG	GC	GG
SNPS148821	0.3	0.4	0.2	2	19	TT	TT	TT	GG	CC	AA
SNPS148822	0.1	0	0.2	2	19	TT	TT	CC	GG	GC	GG
SNPS148823	0.4	0.6	0.2	1	19	CC	GG	CC	GG	GC	GG
SNPS148829	0.333333	0.5	0.2	2	19	TT	GT	CC	GG	GG	GG
SNPS148830	0	0	0	2	19	TT	TT	TC	GG	GC	AG
SNPS148831	0.1	0.2	0	1	20	CT	GT	CC	GG	GC	GG
SNPS148834	0.1	0	0.2	2	19	CT	GT	TC	GG	GC	AG
SNPS148840	0.3	0	0.6	1	19	TT	TT	CC	GG	GC	AG
SNPS148841	0.4	0.4	0.4	1	20	TT	TT	CC	TG	CC	GG
SNPS148842	0.444444	0.2	0.75	1	19	CT	GT	TC	GG	GC	AG
SNPS148847	0.5	0.4	0.6	1	18	CT	GT	CC	TG	GC	GG
SNPS148849	0.1	0.2	0	2	18	CC	GG	CC	GG	GG	GG
SNPS148850	0.3	0.2	0.4	2	18	CT	GG	CC	GG	GG	GG
SNPS148851	0.1	0.2	0	2	19	TT	TT	TC	GG	CC	AG
SNPS148854	0	0	0	2	19	TT	TT	CC	GG	CC	GG
SNPS148855	0	0	0	2	19	TT	TT	TT	GG	CC	AA
SNPS148856	0.3	0	0.6	2	19	TT	TT	TC	GG	CC	AG
SNPS148857	0.3	0	0.6	2	19	TT	GT	CC	TG	GC	GG
SNPS148858	0.4	0.2	0.6	2	19	TT	TT	CC	GG	CC	GG
SNPS148859	0	0	0	2	19	CT	GT	CC	GG	GG	GG
SNPS148863	0.4	0.2	0.6	1	20	CT	GT	CC	GG	GG	GG
SNPS148864	0.1	0.2	0	1	18	TT	GG	TC	TG	CC	AG
SNPS148865	0.1	0.2	0	1	19	CT	GT	CC	GG	GC	GG
SNPS148866	0.777778	0.75	0.8	1	20	TT	TT	CC	GG	CC	GG
SNPS148867	0.6	0.6	0.6	1	18	TT	TT	CC	GG	GC	GG
SNPS148868	0	0	0	1	19	CT	GT	CC	GG	GG	GG
SNPS148870	0.6	0.6	0.6	1	18	TT	GT	CC	GG	GC	GG
SNPS148871	0.1	0.2	0	1	18	CT	GT	TC	GG	GC	AG
SNPS148873	0.2	0.2	0.2	1	18	TT	TT	TT	GG	CC	AA
SNPS148876	0.6	0.8	0.4	1	18	CT	GT	CC	GG	GG	GG
SNPS148882	0.2	0.2	0.2	2	19	TT	TT	CC	GG	CC	GG
SNPS148885	0.125	0	0.25	2	20	TT	TT	CC	TG	CC	GG
SNPS148887	0.1	0	0.2	2	18	CT	GT	CC	GG	GC	GG
SNPS148889	0.111111	0.25	0	2	18	TT	TT	CC	GG	GC	GG
SNPS148891	0.3	0.4	0.2	1	19	CT	GT	TC	GG	GC	AG
SNPS148892	0.333333	0.4	0.25	2	18	CC	GG	CC	GG	GG	GG
SNPS148894	0.222222	0	0.5	2	18	CT	GT	TC	GG	GC	AG
SNPS148895	0.444444	0.4	0.5	2	19	TT	TT	TC	GG	CC	AG
SNPS148896	0.2	0.4	0	2	19	CT	GG	CC	GG	GG	GG
SNPS148899	0.2	0	0.4	1	19	CT	GT	CC	GG	GC	GG
SNPS148902	0.8	0.8	0.8	1	17	TT	TT	TC	GG	CC	AG
SNPS148903	0	0	0	1	19	CT	GT	CC	TG	GC	GG
SNPS148904	0.2	0.2	0.2	1	19	TT	TT	TC	GG	GC	AG
SNPS148907	0.6	0.6	0.6	1	17	CT	GT	CC	GG	GC	GG
SNPS148908	0.125	0.25	0	2	19	TT	GT	TT	GG	CC	AA
SNPS148909	0.1	0	0.2	2	19	CT	GT	CC	TG	GC	GG
SNPS148910	0	0	0	2	19	CT	GT	CC	GG	GC	GG
SNPS148911	0.1	0	0.2	2	18	TT	TT	CC	GG	CC	GG
SNPS148912	0	0	0	2	18	TT	GT	TC	GG	CC	AG
SNPS148913	0.1	0.2	0	2	18	TT	TT	CC	GG	GC	GG
SNPS148914	0.3	0.2	0.4	2	19	TT	TT	TC	TG	CC	AG
SNPS148915	0.4	0.6	0.2	2	18	TT	TT	TT	GG	CC	AA
SNPS148918	0.3	0.2	0.4	1	20	CT	GT	CC	GG	GC	GG
SNPS148921	0.1	0.2	0	1	18	TT	TT	CC	GG	GC	GG
SNPS148922	0.3	0.4	0.2	1	20	TT	TT	CC	GG	CC	GG
SNPS148926	0.625	0.6	0.666667	1	19	CT	GT	TC	GG	GC	AG
SNPS148927	0.555556	0.6	0.5	1	18	CT	GT	TC	GG	GC	AG
SNPS148928	0.3	0.2	0.4	2	18	TT	GT	CC	GG	GG	GG
SNPS148930	0.555556	0.75	0.4	2	19	CC	GG	CC	GG	GG	GG
SNPS148931	0.4	0.2	0.6	2	18	TT	TT	TC	GG	CC	AG
SNPS148932	0.2	0.2	0.2	1	18	CT	GT	CC	GG	GC	GG
SNPS148933	0	0	0	1	20	CT	GT	CC	GG	GG	GG
SNPS148934	0	0	0	2	18	TT	TT	CC	GG	CC	GG
SNPS148936	0	0	0	1	19	TT	TT	TC	GG	CC	AG
SNPS148937	0.3	0.2	0.4	1	19	TT	TT	TC	GG	GC	AG
SNPS148938	0.222222	0.4	0	2	18	TT	GT	TC	GG	CC	AG
SNPS148939	0.1	0	0.2	2	20	TT	TT	TC	GG	CC	AG
SNPS148940	0	0	0	2	18	TT	TT	TC	GG	CC	AG
SNPS148941	0.1	0.2	0	2	19	TT	TT	CC	TG	CC	GG
SNPS148942	0.8	1	0.6	1	20	CT	GT	TC	GG	GC	AG
SNPS148944	0.5	0.6	0.4	1	18	TT	TT	CC	GG	GC	GG
SNPS148945	0.666667	0.8	0.5	1	19	CT	GT	CC	GG	GC	GG
SNPS148947	0	0	0	1	19	TT	TT	CC	GG	GC	GG
SNPS148948	0.4	0.4	0.4	2	18	TT	GT	CC	GG	GG	GG
SNPS148949	0	0	0	1	18	CT	GT	CC	TG	GC	GG
SNPS148950	0.1	0.2	0	2	18	TT	GT	CC	TT	CC	GG
SNPS148951	0.3	0.2	0.4	2	18	CT	GT	CC	GG	CC	GG
SNPS148952	0.4	0	0.8	1	19	TT	TT	CC	GG	CC	GG
SNPS148955	0.222222	0.2	0.25	1	19	CC	GG	CC	GG	GG	GG
SNPS148956	0.1	0.2	0	1	18	TT	TT	CC	TG	CC	GG
SNPS148958	0.1	0.2	0	2	20	CT	GT	TC	GG	GC	AG
SNPS148959	0	0	0	2	18	TT	TT	TC	GG	CC	AG
SNPS148960	0.2	0.2	0.2	1	22	TT	TT	CC	TG	CC	GG
SNPS148962	0.7	0.8	0.6	1	20	TT	TT	TC	GG	CC	AG
SNPS148964	0.1	0.2	0	2	19	TT	TT	CC	GG	CC	GG
SNPS148965	0.222222	0.2	0.25	2	20	TT	TT	TT	GG	CC	AA
SNPS148966	0.5	0.8	0.2	1	20	CC	GG	CC	GG	GG	GG
SNPS148971	0	0	0	1	18	CT	GT	TT	GG	CC	AA
SNPS148972	0.1	0.2	0	1	18	TT	TT	TC	GG	CC	AG
SNPS148975	0.1	0	0.2	1	19	CT	GG	TC	GG	GC	AG
SNPS148976	0.375	0.2	0.666667	2	18	CT	GG	CC	GG	GC	GG
SNPS148977	0.3	0.2	0.4	2	19	TT	TT	CC	GG	GC	GG
SNPS148981	0.1	0.2	0	1	21	TT	TT	TC	GG	CC	AG
SNPS148983	0.2	0.2	0.2	2	19	CC	GG	TC	GG	GC	AG
SNPS148987	0	0	0	2	19	CT	GT	TC	GG	GC	AG
SNPS148988	0.2	0	0.4	1	20	TT	TT	TT	GG	CC	AA
SNPS148989	0.375	0.25	0.5	1	18	TT	TT	TC	GG	CC	AG
SNPS148990	0.8	0.6	1	1	19	CT	GT	TC	GG	GC	missing
SNPS148996	0.9	0.8	1	1	19	CC	GG	CC	GG	GG	GG
SNPS148997	0.3	0.4	0.2	1	18	CC	GG	TC	GG	GC	AG
SNPS148998	0.7	0.6	0.8	1	18	TT	GT	TC	GG	CC	AG
SNPS149000	0.1	0.2	0	2	19	CT	GT	CC	GG	GC	GG
SNPS149001	0.3	0	0.6	2	19	CC	GG	CC	GG	GG	GG
SNPS149003	0.1	0	0.2	1	19	TT	TT	TC	GG	GC	AG
SNPS149004	0.4	0.8	0	2	20	TT	TT	TC	GG	CC	AG
SNPS149005	0	0	0	2	19	CT	GT	CC	GG	GC	GG
SNPS149007	0.555556	0.6	0.5	2	18	CC	GG	CC	GG	GG	GG
SNPS149009	0	0	0	2	19	TT	GT	CC	GG	GG	GG
SNPS149013	0.222222	0.25	0.2	2	18	CC	GG	TC	GG	GC	GG
SNPS149014	0.333333	0.4	0.25	2	19	CT	GT	CC	GG	GC	GG
SNPS149015	0.375	0.4	0.333333	2	20	CT	GG	CC	GG	GC	GG
SNPS149016	0	0	0	2	19	CC	GG	CC	GG	GG	GG
SNPS149017	0.6	0.6	0.6	2	19	CT	GT	CC	TG	GC	GG
SNPS149018	0.3	0.2	0.4	2	19	CT	GT	TC	GG	GC	AG
SNPS149019	0	0	0	1	18	TT	TT	CC	TG	CC	GG
SNPS149022	0.1	0	0.2	1	19	CT	GT	CC	GG	GG	GG
SNPS149023	0.6	0.4	0.8	2	17	CT	GG	TC	GG	GC	AG
SNPS149025	0.2	0	0.4	2	19	TT	TT	CC	GG	CC	GG
SNPS149027	0.4	0.6	0.2	1	19	TT	TT	TC	GG	CC	AG
SNPS149029	0.2	0	0.4	1	19	CT	GG	TC	GG	GC	AG
SNPS149030	0.5	0.4	0.6	1	18	TT	TT	TC	TG	CC	AG
SNPS149031	0	0	0	2	18	TT	TT	TC	GG	GC	AG
SNPS149033	0.3	0.4	0.2	2	18	TT	GG	CC	GG	GC	GG
SNPS149034	0.1	0.2	0	2	20	CT	GT	TC	GG	GC	AG
SNPS149035	0.142857	0.2	0	2	19	TT	GG	TC	GG	GC	AG
SNPS149037	0	0	0	1	19	CT	GT	TC	GG	GC	AG
SNPS149038	0	0	0	1	19	CC	GG	CC	GG	GG	GG
SNPS149039	0.2	0.2	0.2	1	18	TT	TT	CC	TG	GC	GG
SNPS149041	0	0	0	1	19	TT	TT	CC	GG	CC	GG
SNPS149042	0.4	0.6	0.2	1	19	CC	GG	CC	GG	GC	GG
SNPS149043	0.4	0.4	0.4	2	18	CT	GT	CC	GG	GC	GG
SNPS149044	0.1	0.2	0	2	18	TT	TT	CC	GG	GC	GG
SNPS149045	0.5	0.4	0.6	2	19	CT	GT	TC	GG	GC	AG
SNPS149047	0	0	0	2	19	CT	GT	TT	GG	CC	AA
SNPS149051	0.5	0.4	0.6	1	19	TT	TT	TC	GG	CC	AG
SNPS149052	0.3	0.2	0.4	2	19	TT	TT	TT	GG	CC	AA
SNPS149053	0.222222	0	0.5	2	19	TT	TT	TT	GG	CC	AA
SNPS149054	0.7	0.8	0.6	2	19	TT	TT	TT	GG	CC	AA
SNPS149055	0.222222	0	0.4	2	18	CT	GT	CC	GG	GC	GG
SNPS149059	0.2	0.2	0.2	1	18	TT	TT	TC	GG	GC	AG
SNPS149060	0	0	0	2	19	CT	GT	CC	GG	GG	GG
SNPS149064	0.2	0.2	0.2	2	19	TT	GT	CC	TG	CC	GG
SNPS149066	0.3	0.2	0.4	2	18	CT	GT	TC	GG	CC	AG
SNPS149068	0.1	0.2	0	2	18	CC	GG	CC	GG	GG	GG
SNPS149070	0.1	0	0.2	2	20	TT	TT	TC	TG	CC	AG
SNPS149072	0.2	0.2	0.2	2	20	CT	GT	TC	GG	GC	AG
SNPS149073	0.6	0.6	0.6	2	18	TT	TT	TC	GG	CC	AG
SNPS149077	0.5	0.333333	0.6	1	20	CT	GT	CC	GG	GC	GG
SNPS149078	0.4	0.4	0.4	2	18	TT	TT	TC	GG	CC	AG
SNPS149080	0.4	0.4	0.4	2	19	CT	GT	TC	GG	GC	AG
SNPS149081	0.333333	0.5	0.2	2	18	TT	TT	CC	GG	CC	GG
SNPS149082	0.4	0.2	0.6	2	17	TT	TT	CC	GG	CC	GG
SNPS149083	0.444444	0	0.8	2	19	TT	TT	TC	GG	CC	GG
SNPS149084	0.2	0	0.4	2	19	TT	TT	CC	GG	CC	GG
SNPS149085	0.2	0.4	0	2	19	TT	TT	CC	GG	CC	GG
SNPS149090	0.3	0.4	0.2	2	19	TT	TT	TC	GG	CC	GG
SNPS149091	0.2	0.2	0.2	2	19	CT	GG	CC	TG	GC	GG
SNPS149092	0.5	0.6	0.4	2	18	TT	TT	TT	GG	CC	AA
SNPS149093	0.2	0	0.4	2	19	CT	GT	CC	GG	GC	GG
SNPS149094	0.2	0.2	0.2	2	19	TT	GT	CC	GG	GG	GG
SNPS149096	0	0	0	2	18	TT	TT	TC	TG	CC	AG
SNPS149103	0.1	0	0.2	1	19	CT	GT	TC	GG	GC	AG
SNPS149107	0.4	0.2	0.6	2	19	TT	TT	TC	GG	CC	AA
SNPS149110	0.3	0.2	0.4	1	19	CT	GG	CC	GG	GG	GG
SNPS149112	0.3	0.2	0.4	1	20	CT	GT	CC	GG	GC	GG
SNPS149116	0	0	0	1	21	CT	GT	TT	GG	CC	AG
SNPS149118	0.1	0	0.2	1	20	TT	TT	TC	GG	CC	AG
SNPS149134	0.2	0.2	0.2	1	20	TT	TT	CC	TG	CC	GG
SNPS149136	0.1	0	0.2	1	19	CT	TT	TT	GG	CC	AA
SNPS149140	0.3	0.2	0.4	1	19	TT	TT	TC	TG	CC	AG
SNPS149145	0.2	0.4	0	1	20	CT	GT	CC	GG	GG	GG
SNPS149158	0.4	0.6	0.2	1	19	CT	GG	CC	GG	GG	GG
SNPS149160	0.2	0.2	0.2	1	18	CC	GG	CC	GG	GG	GG
SNPS149162	0.5	0.4	0.6	1	19	CC	GT	TC	GG	GC	AG
SNPS149164	0.3	0.2	0.4	1	18	TT	GT	TC	GG	GC	AG
SNPS149171	0.2	0.2	0.2	1	18	CT	GT	CC	GG	GC	GG
SNPS149182	0	0	0	1	19	CT	GG	CC	GG	GG	GG
SNPS149185	0.6	0.4	0.8	1	22	CT	TT	TT	GG	CC	AA
SNPS149187	0.444444	0.75	0.2	2	18	CC	GG	CC	GG	GG	GG
SNPS149193	0.333333	0.25	0.4	1	20	CT	GT	CC	GG	GC	AG
SNPS149197	0	0	0	2	19	TT	GT	CC	TG	GC	GG
SNPS149198	0.222222	0.2	0.25	2	18	CT	GT	CC	TG	GC	GG
SNPS149201	0.1	0	0.2	2	19	TT	GT	TC	GG	CC	AG
SNPS149202	0	0	0	2	19	CT	GT	TC	GG	GC	AG
SNPS149203	0.4	0.2	0.6	2	18	CT	GT	CC	GG	GC	GG
SNPS149205	0.3	0.2	0.4	2	18	CT	GT	CC	GG	GC	GG
SNPS149208	0.666667	0.6	0.75	2	18	CT	GT	TC	GG	GC	AG
SNPS149209	0.222222	0	0.5	2	18	CT	GG	CC	TG	GC	GG
SNPS149213	0.111111	0	0.25	2	19	CT	GG	CC	GG	GG	GG
SNPS149214	0.4	0.4	0.4	2	20	TT	TT	TC	GG	CC	AG
SNPS149215	0.2	0	0.4	2	20	CT	GT	CC	GG	GC	GG
SNPS149221	0.6	0.6	0.6	2	20	CT	GT	CC	GG	GC	GG
SNPS149223	0.2	0.4	0	2	19	CT	GT	CC	GG	GC	GG
SNPS149225	0.2	0	0.4	2	19	CT	GT	CC	GG	GC	GG
SNPS149227	0.555556	0.2	1	2	19	TT	GT	TC	GG	CC	AA
SNPS149229	0.2	0	0.4	2	21	CT	GT	CC	GG	CC	GG
SNPS149230	0.1	0	0.2	2	19	TT	TT	TC	GG	GC	AG
SNPS149231	0.444444	0	0.8	2	20	TT	TT	CC	GG	GC	GG
SNPS149242	0.4	0.2	0.6	2	19	CT	GG	CC	GG	GG	GG
SNPS149244	0.1	0	0.2	2	20	TT	GT	TC	GG	GC	AG
SNPS149248	0.2	0.4	0	2	19	TT	TT	TC	GG	CC	AG
SNPS149249	0.2	0.4	0	2	19	CT	GT	TC	GG	GC	AG
SNPS149252	0.25	0.333333	0.2	2	20	CT	TT	TT	GG	CC	AA
SNPS149257	0.1	0	0.2	2	17	missing	GT	TC	GG	CC	GG
SNPS149258	0.2	0	0.4	2	20	TT	TT	TT	GG	CC	AA
SNPS149259	0.1	0	0.2	2	20	TT	GT	CC	GG	GC	GG
SNPS149262	0.1	0	0.2	2	19	TT	TT	TT	GG	CC	AA
SNPS149265	0.25	0	0.666667	2	19	CT	GT	CC	GG	GC	AG
SNPS149266	0.1	0	0.2	2	18	CT	GT	CC	GG	GG	GG
SNPS149267	0.3	0.4	0.2	2	19	CT	GT	CC	GG	GC	GG
SNPS149269	0.2	0	0.4	2	18	TT	GT	TT	GG	CC	AA
SNPS149271	0.222222	0.2	0.25	2	19	TT	GT	CC	GG	GC	GG
SNPS149275	0	0	0	2	21	TT	TT	CC	GG	GC	AG
SNPS149280	0.3	0.4	0.2	2	20	CT	GT	CC	GG	GC	AG
SNPS149282	0.3	0.2	0.4	2	18	TT	TT	CC	TG	CC	GG
SNPS149284	0.3	0	0.6	2	18	CT	GG	CC	GG	GG	GG
SNPS149286	0.1	0	0.2	2	18	TT	TT	TC	GG	CC	AG
SNPS149290	0	0	0	2	20	CT	GG	CC	GG	GG	GG
SNPS149291	0.3	0	0.6	2	19	TT	GT	TC	TG	CC	AG
SNPS149294	0.2	0	0.4	2	20	CT	GT	TC	GG	CC	GG
SNPS149298	0.4	0.4	0.4	2	20	CT	GT	CC	GG	CC	GG
SNPS149299	0.4	0.6	0.2	2	20	TT	TT	TC	GG	CC	AG
SNPS149302	0.1	0.2	0	2	18	CC	GG	CC	GG	GC	GG
SNPS149305	0	0	0	2	18	CT	GG	TC	GG	GC	AG
SNPS149306	0.3	0	0.6	2	19	CT	GT	TC	GG	GC	AG
SNPS149310	0.2	0.2	0.2	2	19	TT	GT	TC	TG	CC	AG
SNPS149311	0.3	0.2	0.4	2	19	CT	GT	CC	GG	GC	AG
SNPS149313	0.2	0.2	0.2	2	18	TT	TT	CC	TG	GC	GG
SNPS149316	0.2	0	0.4	2	19	CT	GT	TT	GG	CC	AG
SNPS149321	0.285714	0.25	0.333333	2	18	CT	GT	CC	GG	GG	GG
SNPS149324	0.4	0.2	0.6	2	19	TT	TT	TC	GG	CC	AA
SNPS149326	0.3	0.4	0.2	2	20	CT	GT	CC	GG	GC	GG
SNPS149327	0.25	0	0.4	2	19	CT	GG	TC	GG	GC	AG
SNPS149329	0.1	0.2	0	2	19	TT	GG	CC	GG	GC	GG
SNPS149330	0.3	0	0.6	2	20	CT	GT	TC	GG	GC	AG
SNPS149331	0.1	0	0.2	2	19	TT	GT	CC	GG	GC	GG
SNPS149332	0.3	0	0.6	2	21	TT	TT	CC	GG	CC	GG
SNPS149333	0.5	0.5	0.5	2	20	CT	GT	CC	TG	GC	GG
SNPS149336	0.1	0	0.2	2	20	CT	GT	CC	GG	GC	GG
SNPS149341	0.1	0	0.2	2	19	CT	GT	TC	GG	GC	AG
SNPS149342	0.4	0.4	0.4	2	22	TT	GT	CC	GG	GC	GG
SNPS149343	0.1	0	0.2	2	20	missing	GT	TC	GG	CC	AG
SNPS149347	0.3	0.2	0.4	2	19	TT	TT	CC	TG	CC	GG
SNPS149348	0.2	0.2	0.2	2	19	CC	GT	CC	GG	GG	GG
SNPS149349	0.6	0.6	0.6	2	18	CC	GG	CC	GG	GG	GG
SNPS149353	0.1	0	0.2	2	18	CT	GT	CC	GG	GC	GG
SNPS149354	0.2	0.2	0.2	2	18	TT	GT	TT	GG	CC	AA
SNPS149356	0.4	0.6	0.2	2	19	TT	GT	CC	GG	CC	GG
SNPS149357	0.2	0	0.4	2	18	TT	TT	TC	GG	CC	AG
SNPS149361	0.2	0	0.4	2	20	CC	GG	CC	GG	GG	GG
SNPS149362	0.444444	0.4	0.5	2	19	TT	TT	TT	GG	CC	AA
SNPS149363	0.5	0.4	0.6	2	18	CT	GT	CC	GG	GC	GG
SNPS149364	0.3	0.2	0.4	2	18	CC	GG	CC	GG	GG	GG
SNPS149366	0.2	0	0.4	2	20	TT	TT	CC	GG	CC	GG
SNPS149368	0.333333	0.4	0.25	2	19	CT	GT	TC	GG	GC	AG
SNPS149370	0.3	0.2	0.4	2	20	CT	GT	TC	GG	CC	AG
SNPS149371	0.2	0.2	0.2	2	18	CT	GT	TC	GG	GC	AG
SNPS149372	0.4	0.4	0.4	2	19	TT	TT	TC	GG	CC	AG
SNPS149375	0.111111	0	0.25	2	18	CT	GT	TC	GG	GC	AG
SNPS149377	0.2	0.2	0.2	2	19	CT	GT	TC	GG	GC	AG
SNPS149380	0.3	0.2	0.4	2	19	CT	GG	CC	GG	GG	GG
SNPS149381	0.3	0	0.6	2	18	CC	GG	TC	GG	GC	AG
SNPS149385	0.2	0	0.4	2	18	CT	GG	TC	GG	GC	AG
SNPS149390	0.375	0.666667	0.2	2	20	TT	TT	TC	GG	CC	AG
SNPS149391	0.2	0.4	0	2	20	TT	TT	TC	GG	CC	AG
SNPS149392	0.2	0.2	0.2	2	19	CT	GT	TC	GG	CC	AG
SNPS149393	0.2	0.4	0	2	19	CT	GT	CC	GG	CC	GG
SNPS149395	0.222222	0.2	0.25	2	20	CT	GT	TC	GG	GC	AG
SNPS149396	0.6	0.4	0.8	2	20	TT	TT	TC	GG	GC	AG
SNPS149397	0	missing	0	2	19	TT	TT	CC	GG	CC	GG
SNPS149398	0.1	0.2	0	2	19	CT	GT	TC	GG	GC	AG
SNPS149399	0.2	0.2	0.2	2	18	CT	GT	CC	GG	GC	GG
SNPS149400	0.3	0.4	0.2	2	18	TT	GT	TC	GG	GC	AG
SNPS149401	0.2	0.2	0.2	2	19	TT	TT	TT	GG	CC	AA
SNPS149403	0.1	0.2	0	2	19	CC	GG	CC	GG	GG	GG
SNPS149404	0.5	0.4	0.6	2	18	TT	GG	CC	TG	CC	GG
SNPS149405	0	0	0	2	19	TT	TT	CC	GG	GC	GG
SNPS149406	0.444444	0.25	0.6	2	20	CT	GT	CC	GG	GG	GG
SNPS149407	0.4	0.2	0.6	2	19	TT	GT	TC	GG	GC	AG
SNPS149409	0.1	0	0.2	2	20	CT	GG	TC	GG	GC	AG
SNPS149410	0.2	0.2	0.2	2	19	TT	TT	CC	GG	CC	GG
SNPS149411	0.6	0.4	0.8	2	19	TT	TT	TC	GG	CC	AG
SNPS149412	0.3	0.2	0.4	2	18	CT	GT	TC	GG	CC	AG
SNPS149413	0.3	0.2	0.4	2	19	TT	GT	CC	TG	CC	GG
SNPS149414	0.25	0.25	0.25	2	20	CT	GT	CC	GG	GG	GG
SNPS149415	0.4	0.4	0.4	2	19	TT	TT	CC	GG	CC	GG
SNPS149416	0.3	0.2	0.4	2	19	TT	GT	TC	GG	GC	AG
SNPS149418	0	0	0	2	18	TT	TT	CC	TG	CC	GG
SNPS149419	0.4	0.4	0.4	2	19	TT	GT	CC	GG	CC	GG
SNPS149422	0.444444	0.5	0.4	2	19	CT	GT	CC	GG	CC	GG
SNPS149423	0.1	0	0.2	2	20	TT	TT	TC	GG	CC	AG
SNPS149425	0.4	0.4	0.4	2	18	TT	TT	CC	TT	CC	GG
SNPS149426	0.6	0.4	0.8	2	19	TT	TT	TT	GG	CC	AA
SNPS149429	0.444444	0.5	0.4	2	20	CT	GT	CC	GG	GC	GG
SNPS149430	0.5	0.4	0.6	2	18	CT	GG	CC	TG	GC	GG
SNPS149431	0.5	0.75	0.25	2	19	CT	GT	CC	TG	GC	GG
SNPS149433	0.1	0.2	0	2	19	TT	TT	TC	GG	CC	AA
SNPS149434	0.5	0.6	0.4	2	18	TT	GT	TT	GG	CC	AA
SNPS149435	0.3	0.4	0.2	2	19	TT	GT	CC	TG	CC	GG
SNPS149437	0.1	0	0.2	2	20	TT	TT	TC	GG	CC	AG
SNPS149438	0.1	0.2	0	2	19	TT	GT	TC	GG	GC	AG
SNPS149439	0.3	0.4	0.2	2	18	CC	GG	CC	GG	GC	GG
SNPS149441	0.444444	0.4	0.5	2	20	CT	GT	CC	GG	GC	GG
SNPS149442	0.1	0	0.2	2	18	TT	GT	CC	GG	CC	GG
SNPS149443	0.4	0.4	0.4	2	20	TT	TT	CC	GG	GC	GG
SNPS149444	0.333333	0	0.6	2	19	TT	TT	TC	GG	CC	AG
SNPS149445	0.1	0	0.2	2	20	CC	GG	CC	GG	GC	GG
SNPS149447	0.2	0	0.4	2	19	TT	TT	TC	TG	CC	AG
SNPS149448	0.1	0	0.2	2	19	CT	GT	CC	TG	GC	GG
SNPS149449	0.4	0.4	0.4	2	19	TT	TT	CC	GG	CC	GG
SNPS149451	0.444444	0.5	0.4	2	19	TT	TT	TC	TG	CC	AG
SNPS149452	0.444444	0.5	0.4	2	18	TT	GT	TC	GG	GC	AG
SNPS149454	0.166667	0.25	0	2	18	CT	GT	CC	GG	GC	GG
SNPS149456	0.1	0.2	0	2	20	TT	GT	TC	GG	GC	AG
SNPS149457	0.6	0.8	0.4	2	18	TT	TT	CC	GG	GC	GG
SNPS149458	0.3	0.4	0.2	2	19	CT	GT	TC	GG	CC	AG
SNPS149460	0.2	0.2	0.2	2	18	CT	GT	TC	GG	GC	AG
SNPS149461	0.3	0.2	0.4	2	19	TT	TT	TT	GG	CC	AA
SNPS149462	0.6	0.6	0.6	2	18	CT	GT	TC	GG	GC	AG
SNPS149463	0.555556	0.75	0.4	2	19	TT	TT	CC	GG	GC	GG
SNPS149464	0.7	0.6	0.8	2	18	TT	GT	CC	TG	CC	GG
SNPS149465	0.555556	0.5	0.6	2	19	CT	GT	CC	GG	GC	GG
SNPS149466	0.4	0.4	0.4	2	19	TT	TT	TC	GG	CC	AG
SNPS149467	0.4	0.2	0.6	2	19	CT	GT	CC	GG	GC	GG
SNPS149468	0.4	0.4	0.4	2	19	CT	GT	CC	GG	GC	GG
SNPS149469	0.4	0	0.8	2	18	CT	GT	CC	GG	GC	GG
SNPS149472	0.3	0.2	0.4	2	20	CT	GT	CC	GG	GC	GG
SNPS149473	0.1	0	0.2	2	18	CT	GT	CC	GG	GG	GG
SNPS149474	0.3	0.2	0.4	2	19	CC	GG	CC	GG	GG	GG
SNPS149475	0.3	0.2	0.4	2	18	CT	GG	TC	GG	GC	AG
SNPS149476	0.6	0.8	0.4	2	18	TT	TT	TC	GG	CC	AG
SNPS149477	0.2	0	0.4	2	19	CT	GG	CC	GG	GG	GG
SNPS149478	0.2	0.2	0.2	2	18	CT	GG	CC	GG	GG	GG
SNPS149479	0	missing	0	2	19	TT	TT	TC	GG	GC	AG
SNPS149480	0.2	0.2	0.2	2	19	CT	GT	TC	GG	GC	AG
SNPS149481	0.166667	0.25	0	2	20	TT	TT	TC	TG	CC	AG
SNPS149482	0.4	0.6	0.2	2	19	CT	GT	CC	GG	GC	GG
SNPS149483	0.5	0.4	0.6	2	20	TT	TT	TT	GG	CC	AA
SNPS149484	0.7	0.6	0.8	2	17	CT	GT	CC	GG	GC	GG
SNPS149485	0.5	0.4	0.6	2	17	CT	GT	CC	GG	GC	GG
SNPS149488	0.2	0	0.4	2	18	TT	GT	TC	GG	CC	AG
SNPS149490	0.3	0.2	0.4	2	21	TT	TT	TT	GG	CC	AA
SNPS149491	0.444444	0.25	0.6	2	20	TT	GT	TC	TG	CC	AG
SNPS149492	0.2	0.2	0.2	2	19	CT	GG	CC	GG	GG	GG
SNPS149493	0.444444	0.25	0.6	2	18	CT	GT	TC	GG	GC	AG
SNPS149495	0.6	0.6	0.6	2	20	CT	GT	TC	GG	GC	AG
SNPS149496	0.1	0.2	0	2	20	TT	GT	TC	GG	CC	missing
SNPS149499	0.666667	1	0.4	2	20	TT	GT	CC	GG	CC	GG
SNPS149501	0.2	0.2	0.2	2	19	CT	GT	TC	GG	GC	AG
SNPS149506	0	missing	0	2	18	CT	GT	CC	GG	GG	GG
SNPS149507	0.2	0.2	0.2	2	18	TT	GG	CC	TT	CC	GG
SNPS149508	0	0	0	2	20	TT	TT	TT	GG	CC	AA
SNPS149509	0.25	0	0.333333	2	19	CC	GG	CC	GG	GG	GG
SNPS149510	0.2	0.2	0.2	2	18	TT	TT	TC	GG	GC	AG
SNPS149513	0.25	0.4	0	2	19	CC	GT	TC	GG	GC	AG
SNPS149516	0	0	0	2	19	CC	GG	CC	GG	GG	GG
SNPS149517	0.333333	0.4	0.25	2	18	CC	GG	CC	GG	GG	GG
SNPS149518	0.111111	0	0.25	2	19	TT	GT	TT	GG	CC	AA
SNPS149519	0.2	0	0.4	2	18	CT	TT	TT	GG	CC	AA
SNPS149520	0.3	0.4	0.2	2	19	TT	TT	CC	GG	CC	GG
SNPS149521	0.2	0.2	0.2	2	19	CT	GG	CC	GG	GG	GG
SNPS149523	0.6	0.6	0.6	2	20	TT	TT	TC	GG	GC	AG
SNPS149524	0.5	0.6	0.4	2	19	CC	GG	CC	GG	GG	GG
SNPS149525	0.8	0.8	0.8	2	19	TT	GT	CC	GG	CC	GG
SNPS149526	0.3	0.4	0.2	2	19	CT	GT	CC	GG	GC	GG
SNPS149527	0.222222	0.2	0.25	2	18	TT	TT	CC	GG	GG	GG
SNPS149528	0.3	0	0.6	2	19	TT	TT	CC	GG	CC	GG
SNPS149532	0.2	0.2	0.2	2	20	CT	GT	CC	TG	GC	GG
SNPS149536	0.2	0	0.4	2	18	CT	GG	CC	TG	GC	GG
SNPS149537	0.2	0	0.4	2	18	TT	GT	CC	GG	CC	GG
SNPS149538	0.3	0.2	0.4	2	19	TT	GT	TC	GG	CC	AG
SNPS149539	0.111111	0.2	0	2	19	CT	GT	CC	GG	GG	GG
SNPS149540	0.2	0	0.4	2	19	TT	TT	CC	GG	CC	AG
SNPS149541	0.1	0.2	0	2	19	TT	TT	TT	GG	CC	AA
SNPS149543	0.111111	0	0.25	2	18	TT	TT	TC	GG	CC	AG
SNPS149544	0.2	0.2	0.2	2	18	TT	TT	TC	GG	GC	GG
SNPS149545	0.4	0.2	0.6	2	18	CT	GT	CC	GG	GG	GG
SNPS149546	0.6	0.8	0.4	2	19	CT	GG	CC	GG	GC	GG
SNPS149547	0.2	0.2	0.2	2	19	CT	GT	CC	TG	GC	GG
SNPS149548	0.2	0	0.4	2	19	CT	GG	TC	TG	CC	AG
SNPS149550	0.1	0	0.2	2	19	TT	TT	TC	GG	CC	AG
SNPS149551	0.3	0.4	0.2	2	19	TT	GT	CC	TG	GC	GG
SNPS149552	0.4	0.4	0.4	2	20	TT	TT	CC	GG	CC	GG
SNPS149554	0.3	0.2	0.4	2	20	CT	GT	CC	GG	GC	GG
SNPS149555	0.4	0.2	0.6	2	18	CC	GG	CC	GG	GG	GG
SNPS149556	0.6	0.8	0.4	2	19	CT	GT	TT	GG	CC	AA
SNPS149557	0.3	0.4	0.2	2	19	TT	GT	CC	TG	CC	GG
SNPS149558	0.6	0.8	0.4	2	20	TT	GT	TC	TG	CC	AG
SNPS149560	0.1	0.2	0	2	20	TT	GT	CC	GG	CC	GG
SNPS149563	0.2	0	0.4	2	17	TT	TT	TC	GG	CC	AG
SNPS149564	0.6	0.4	0.8	2	19	TT	TT	CC	GG	GC	GG
SNPS149565	0.7	0.6	0.8	2	19	TT	TT	CC	TG	CC	GG
SNPS149566	0.4	0.2	0.6	2	18	CT	GT	TC	GG	GC	AG
SNPS149567	0.1	0.2	0	2	19	CT	GT	CC	TG	GC	GG
SNPS149568	0.7	0.4	1	2	19	CT	GT	TC	GG	GC	AG
SNPS149569	0.2	0.2	0.2	2	20	TT	TT	TT	GG	CC	AA
SNPS149570	0.4	0.4	0.4	2	19	CT	GT	CC	GG	GC	GG
SNPS149571	0.25	0.333333	0.2	2	19	TT	GT	CC	GG	GG	GG
SNPS149572	0.5	0.2	0.8	2	20	TT	GT	CC	TG	CC	GG
SNPS149574	0.4	0.4	0.4	2	19	TT	TT	CC	GG	CC	GG
SNPS149576	0.2	0.4	0	2	18	CT	GT	CC	GG	GC	GG
SNPS149577	0.3	0.4	0.2	2	20	CC	GG	CC	GG	GG	GG
SNPS149578	0.3	0.4	0.2	2	18	CT	GT	CC	GG	GC	AG
SNPS149580	0.4	0.6	0.2	2	18	CT	GG	CC	GG	GG	GG
Note. Gender was coded as 1 = male versus 2 = female.
